# Supplementary material for: Harnessing the enantiomeric recognition ability of hydrophobic polymers of intrinsic microporosity (PIM-1) toward amino acids by converting them into hydrophilic polymer dots
Source: Royal Society of Chemistry journal article supplement (doi:10.1039/d0tc03138k), 2020-01-01
Supplement: d0tc03138k1.pdf [file d0tc03138k1.pdf]

## **Harnessing the enantiomeric recognition ability of hydrophobic polymers of intrinsic microporosity (PIM) toward amino acids by converting them into hydrophilic polymer dots**

Froozan Feizi<sup>a</sup>, Mojtaba Shamsipur<sup>†,\*</sup>, Mohammad Bagher Gholivand<sup>†</sup>, Avat (Arman) Taherpour<sup>†</sup>, Ali Barati<sup>†,\*</sup>, Hosna Shamsipur<sup>‡</sup>, Ezeddin Mohajerani<sup>‡</sup>, Peter Budd<sup>§</sup>

<sup>†</sup> *Department of Chemistry, Razi University, Kerman shah, Iran*

<sup>‡</sup> *Laser and Plasma Research Institute, Shahid Beheshti University, Tehran, Iran*

<sup>§</sup> *Department of Chemistry, University of Manchester, Manchester, M13 9PL, UK*

\*Corresponding authors. Tel: +98 9121097502  
E-mail: [mshamsipur@yahoo.com](mailto:mshamsipur@yahoo.com) (Mojtaba Shamsipur)  
[Barati0918@gmail.com](mailto:Barati0918@gmail.com) (Ali Barati)

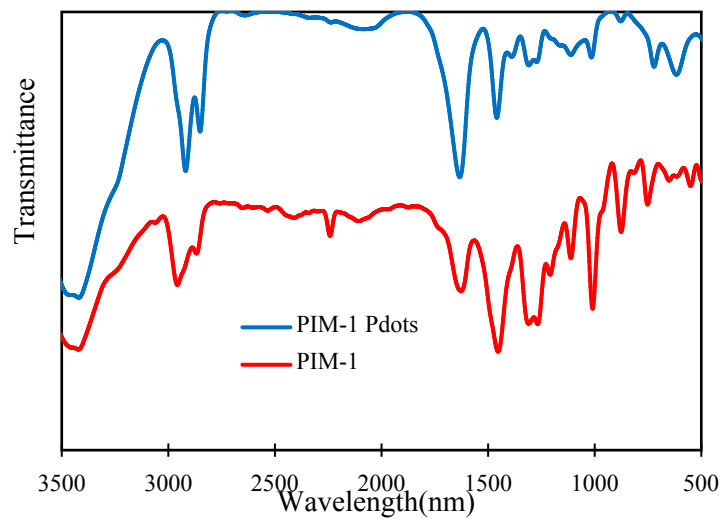

**Fig. S1.** FTIR spectra of PIM-1 and Pdots prepared from PIM-1.

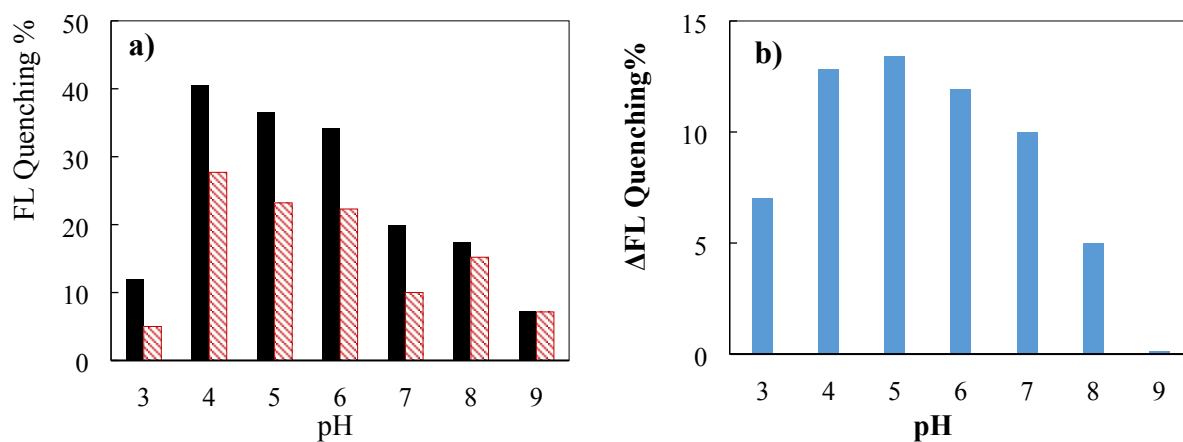

**Fig. S2.** a) Fluorescence quenching percentages of Pdots ( $4.0 \times 10^{-4}$  mg ml<sup>-1</sup>) in the presence of 100 μM D-Tyr (solid lines) and L-Tyr (dashed lines) enantiomers (in 10 mM general buffer solution). b) Difference between the fluorescence quenching percentages for L- and D-enantiomers.

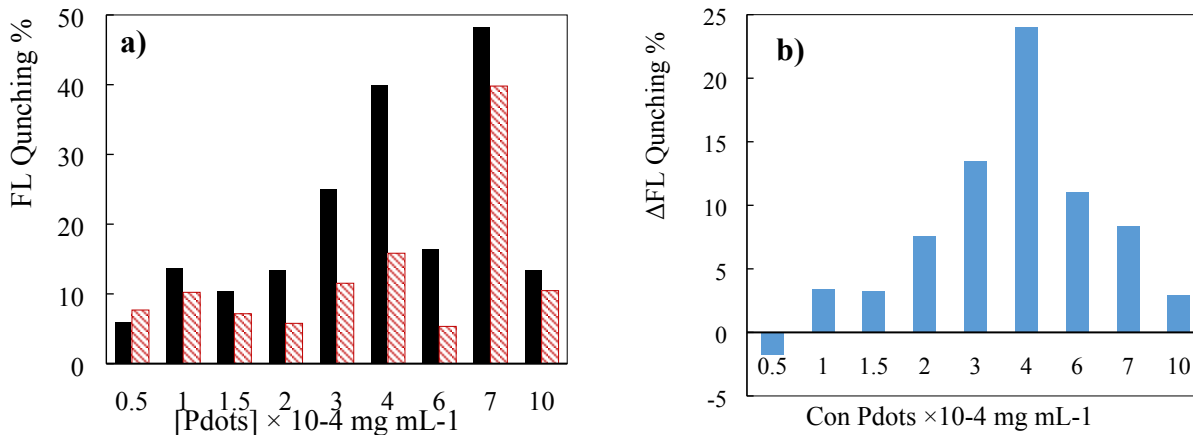

**Fig. S3.** a) Fluorescence quenching percentages of Pdots at concentrations 0.5, 1, 1.5, 2, 3, 4, 6, 7, and 10 × 10<sup>-4</sup> mg mL<sup>-1</sup> in 10 mM general buffer solution with pH=5 in the presence of 100 μM D-Tyr (solid lines) and L-Tyr (dashed line) enantiomers. b) Difference between the fluorescence quenching percentages for different concentrations of Pdots.

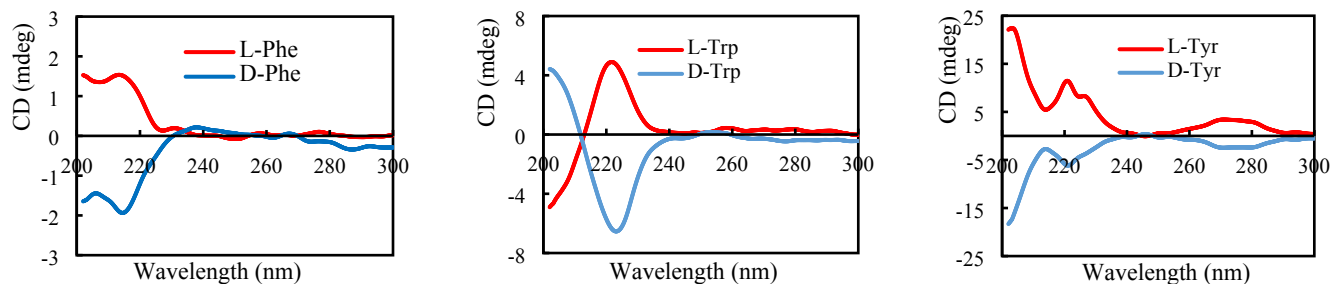

**Fig. S4.** CD spectra of 0.5 mM Phe, Trp, and Tyr enantiomers in water.

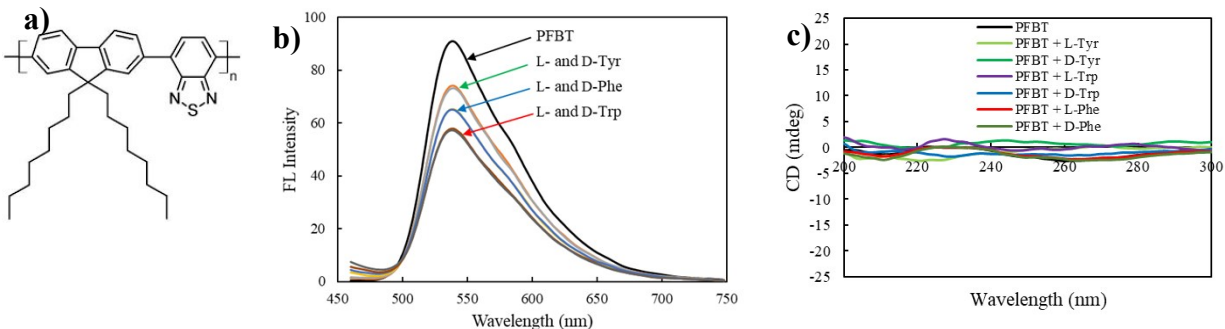

**Fig. S5.** a) Polymer structure of PFBT, b) fluorescence response of Pdots prepared from PFBT and PSMA to 100  $\mu\text{M}$  of amino acid enantiomers, and c) CD spectra of Pdots prepared from PFBT and PSMA in the presence of 40  $\mu\text{M}$  of amino acid enantiomers.

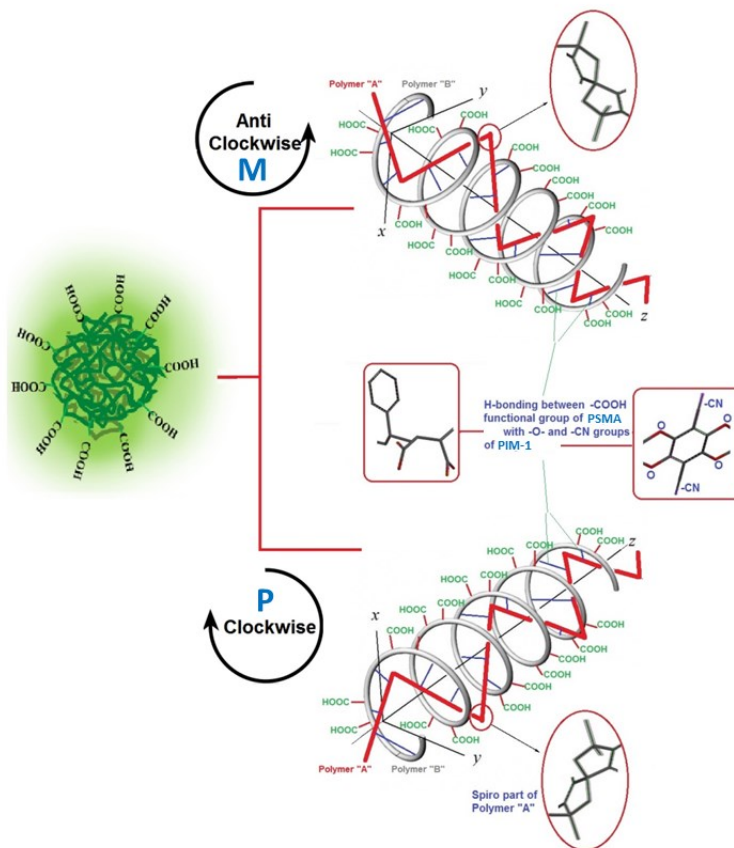

**Fig. S6.** Schematic presentation of the theoretically possible P (clockwise) and M (anticlockwise) helical structures from co-precipitation of achiral PSMA and racemic PIM-1.
